# Supplementary material for: Comparison of cardiac magnetic resonance imaging, functional and haemodynamic variables in pulmonary arterial hypertension: insights from REPAIR
Source: PubMed Central journal article supplement (PMC10860210; doi:10.1183/23120541.00547-2023), 2024-02-12
Supplement: 00547-2023.SUPPLEMENT.pdf [file 00547-2023.SUPPLEMENT.pdf]

**Comparison of cardiac magnetic resonance imaging, functional and  
haemodynamic variables clinical endpoints in pulmonary arterial  
hypertension: insights from the REPAIR study**

**Supplemental Material**

**Authors:** David G Kiely<sup>1,2</sup>, Richard Channick<sup>3</sup>, Dayana Flores<sup>4</sup>, Nazzareno Galiè<sup>5</sup>,  
Gwen MacDonald<sup>4</sup>, J Tim Marcus<sup>6</sup>, Lada Mitchell<sup>4</sup>, Andrew Peacock<sup>7</sup>, Stephan  
Rosenkranz<sup>8</sup>, Ahmed Tawakol<sup>9</sup>, Adam Torbicki<sup>10</sup>, Anton Vonk Noordegraaf<sup>6</sup>, Andrew  
J Swift<sup>2</sup>

## 1 SUPPLEMENTAL MATERIAL

### Supplemental Methods

#### Statistical analysis

##### **Cohen's d treatment effect size estimator**

Cohen's d effect size is computed according to the formula:[1]

$$\text{Cohen's } d = \frac{\text{Mean of the change from baseline to Week 26 or Week 52}}{\text{Standard Deviation of the change from baseline to Week 26 or Week 52}}$$

##### **Cliff's Delta analysis (non-parametric)**

The Cliff's Delta estimator is obtained according to the formula:[2]

Variables for which a post-baseline measurement greater than the baseline measurement denotes improvement:

$$\text{Delta} = \frac{\#(X_1 > X_2) - \#(X_1 < X_2)}{n_1 n_2}$$

Variables for which a post-baseline measurement less than the baseline measurement denotes improvement:

$$\text{Delta} = \frac{\#(X_2 > X_1) - \#(X_2 < X_1)}{n_1 n_2}$$

Where for each variable of interest:

- $X_1$  is the post-baseline measurement
- $X_2$  is the baseline measurement
- $n_1$  is the number of patients with a post-baseline measurement
- $n_2$  is the number of patients with a baseline measurement

**Supplemental Appendix I****Institutional Review Boards/ethics committees**

| <b>Country</b>                  | <b>Site #</b> | <b>Name of IEC/IRB</b>                                                                                                                                                                              |
|---------------------------------|---------------|-----------------------------------------------------------------------------------------------------------------------------------------------------------------------------------------------------|
| <b>Malaysia</b>                 | 9001          | Local: IJN Research Ethics Committee                                                                                                                                                                |
| <b>Singapore</b>                | 1201          | Local: NHG Domain Specific Review Board                                                                                                                                                             |
|                                 | 1202*         | Local: NHG Domain Specific Review Board                                                                                                                                                             |
| <b>Hong Kong</b>                | 1301          | Local: Institutional Review Board of the University of Hong Kong/ Hospital Authority Hong Kong West Cluster                                                                                         |
|                                 | 1302          | Local: Institutional Review Board of the University of Hong Kong/ Hospital Authority Hong Kong West Cluster                                                                                         |
|                                 | 1303          | Local: Research Ethics Committee (Kowloon Central/Kowloon East Cluster)                                                                                                                             |
| <b>Russia</b>                   | 1101          | Local: Ethics Committee of Federal State Budgetary Institution "Almazov National Medical Research Centre" of the Ministry of Health of the Russian Federation.                                      |
|                                 | 1102          | Local: Independent Ethics committee of clinical trials of Federal State Budgetary Institution "National Medical Research Centre of Cardiology" of the Ministry of Health of the Russian Federation. |
| <b>Israel</b>                   | 8001          | Local: Ethics Helsinki Committee                                                                                                                                                                    |
|                                 | 8002          | Local: Ethics Helsinki Committee                                                                                                                                                                    |
| <b>United States of America</b> | 1001*         | Local: Partners Human Research Committee                                                                                                                                                            |
|                                 | 1002*         | Local: Western Institutional Review Board                                                                                                                                                           |
|                                 | 1004*         | Local: Western Institutional Review Board                                                                                                                                                           |
|                                 | 1005          | Central: Western Institutional Review Board                                                                                                                                                         |
|                                 | 1006          | Local: UT Southwestern Institutional Review Board                                                                                                                                                   |
|                                 | 1007*         | Local: Aurora Health Care Research Subject Protection Program and IRB office                                                                                                                        |

|                       |                                                             |                                                                                                    |
|-----------------------|-------------------------------------------------------------|----------------------------------------------------------------------------------------------------|
|                       | 1008*                                                       | Local: Weill Cornell Medicine IRB                                                                  |
|                       | 1009*                                                       | Local: University of Minnesota Human Research Protection Program                                   |
|                       | 1010*                                                       | Local: Western Institutional Review Board                                                          |
|                       | 1012                                                        | Local: The Washington University in St Louis IRB                                                   |
|                       | 1014*                                                       | Local: Western Institutional Review Board                                                          |
|                       | 1015*                                                       | Local: Houston Methodist Research Institute IRB                                                    |
| <b>Australia</b>      | 2001*                                                       | Central: The Prince Charles Hospital HREC                                                          |
| <b>France</b>         | 3002, 3003*,<br>3004*, 3005,<br>3007, 3008,<br>3010*, 3011  | Central: Comité de Protection des Personnes Est III                                                |
| <b>Germany</b>        | 4001, 4002*,<br>4003, 4004*,<br>4005, 4006*,<br>4007, 4008* | Central: Ethic Committee of the Medical Faculty of Heidelberg                                      |
| <b>Italy</b>          | 5001*                                                       | Central: Comitato Etico Azienda Ospedaliero Universitaria di Bologna Policlinico S.Orsola-Malpighi |
|                       | 5002                                                        | Local: Comitato di Bioetica della Fondazione IRCCS Policlinico S. Matteo di Pavia                  |
| <b>Netherlands</b>    | 6001, 6002,<br>6004, 6005*,<br>6006*                        | Central: Medical Ethical Committee VU                                                              |
| <b>United Kingdom</b> | 7001*, 7003,<br>7005                                        | Central: NRES Committee Yorkshire & The Humber – Leeds West Health Research Authority              |

\*Sites that were initiated but that did not enrol any subjects.

### Supplemental Figure 1. Study design

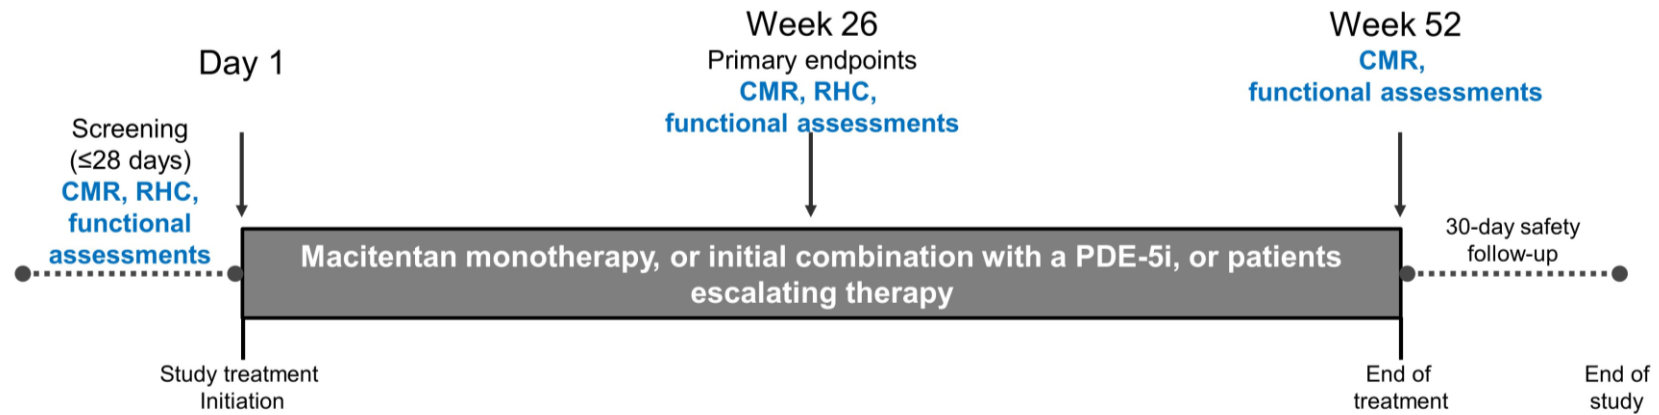

Study design figure has been previously published.[3] CMR: cardiac magnetic resonance imaging; PDE-5i: phosphodiesterase 5 inhibitor; RHC: right heart catheterisation.

**Supplemental Figure 2. Cohen's d (a) and Cliff's delta (b) statistics for absolute and log-transformed NT-proBNP (ng/L) values at Weeks 26 and 52 (safety set)**

a)

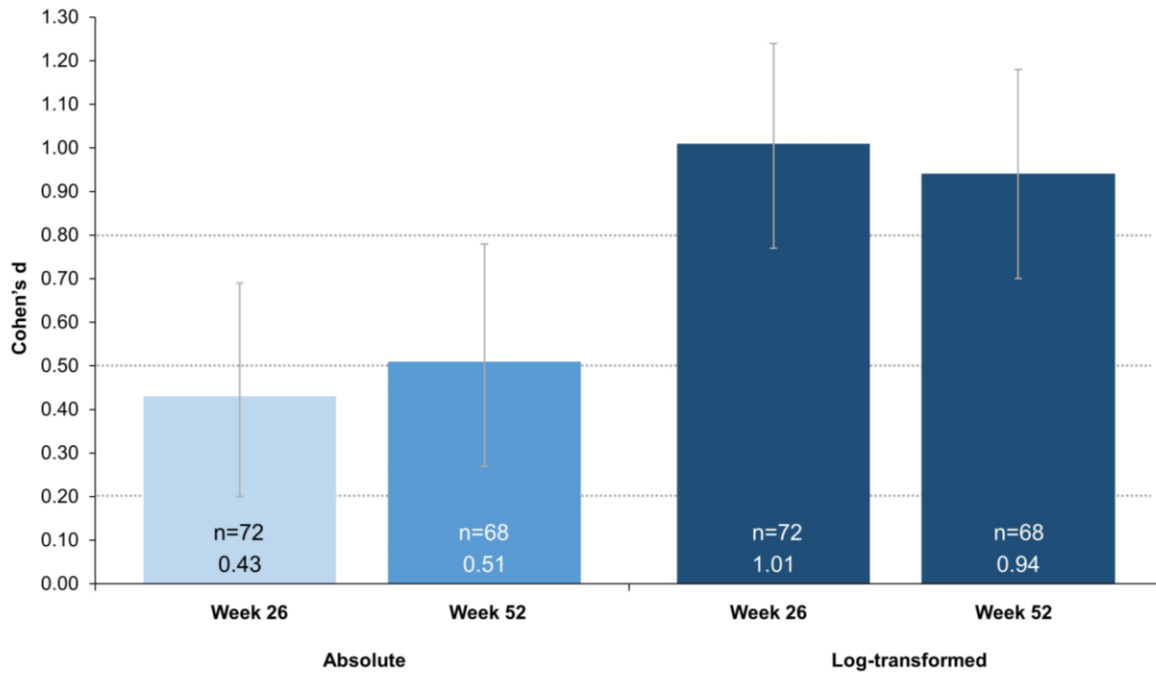

b)

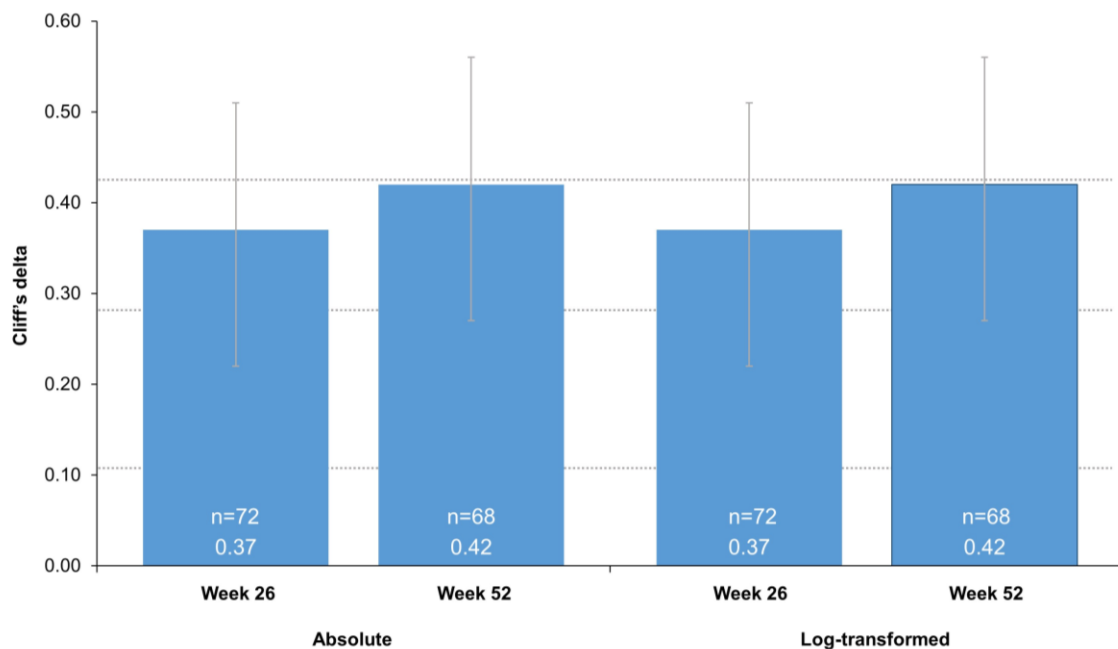

n = number of patients with baseline and post-baseline measurements for a specific variable; Cohen's d and Cliff's delta statistics are reported below the n values. For the standardised treatment effect sizes, ■ dark blue indicates a large change, ■ mid-blue indicates a medium change, ■ light blue indicates a small/fair change. NT-proBNP: N-terminal pro-brain natriuretic peptide.

**Supplemental Figure 3. (a) Cohen’s d statistic at Week 52, and Cliff’s delta statistic at (b) Week 26, and (c) at Week 52 for CMR and functional variables in treatment-naïve (N = 56) and escalating (N = 31) patients (safety set)**

a)

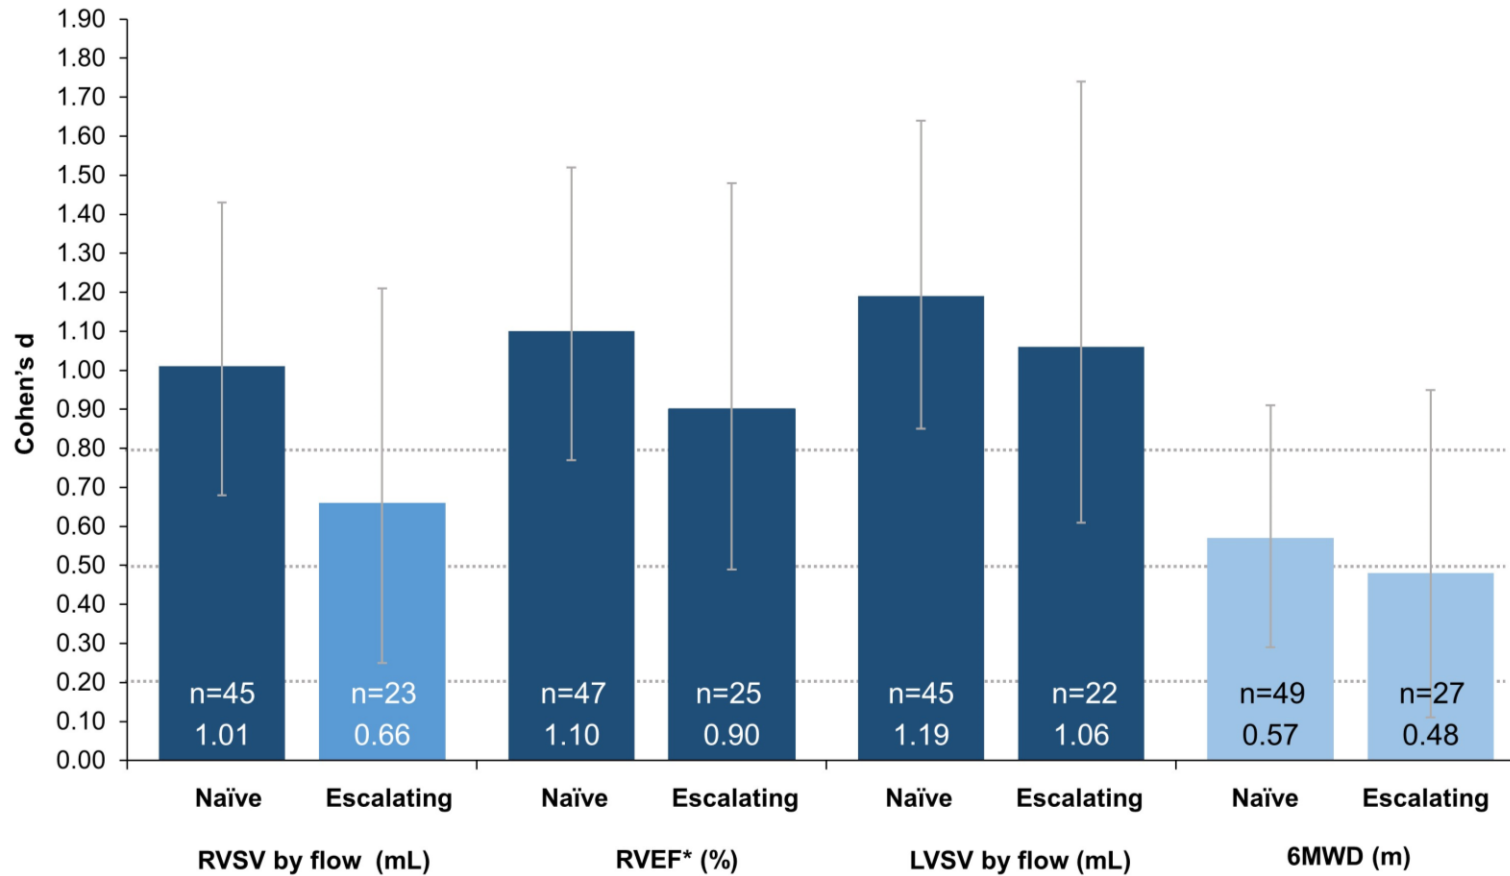

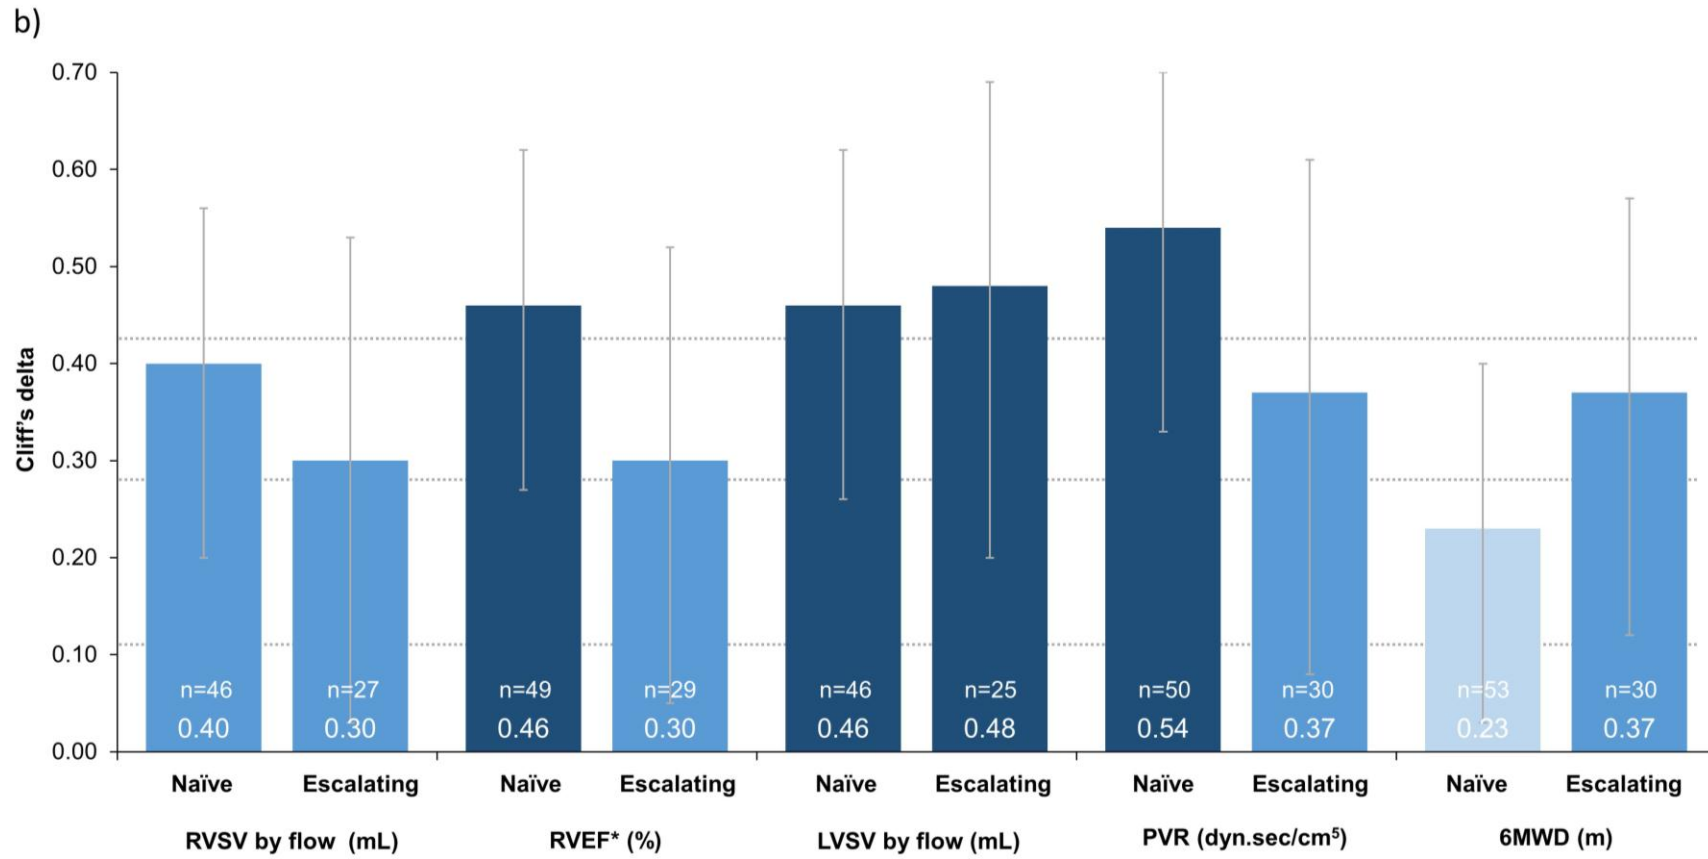



c)

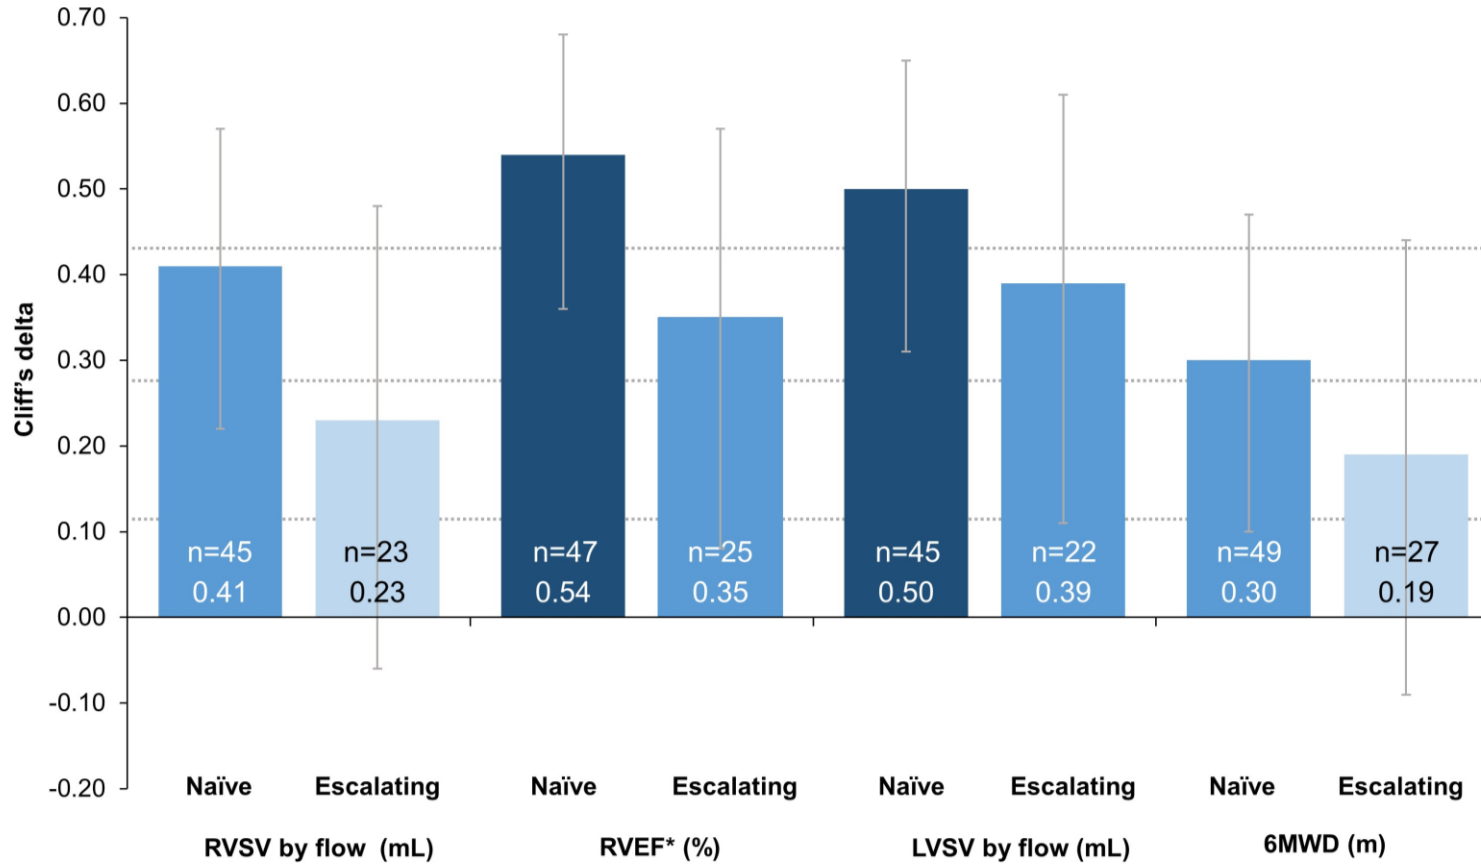

\*Determined from standard volumetric measurements. n = number of patients with baseline and post-baseline measurements for a specific variable; Cohen's d and Cliff's delta statistic are reported below the n values. For the standardised treatment effect sizes, ■ dark blue indicates a large change, ■ mid-blue indicates a medium change, ■ light blue indicates a small/fair change. 6MWD: 6-minute walk distance; CMR: cardiac magnetic resonance imaging; LVSV: left ventricular stroke volume; PVR: pulmonary vascular resistance; RVEF: right ventricular ejection fraction; RVSV: right ventricular stroke volume.

**Supplemental Figure 4. Cliff's delta statistics at (a) Week 26 and (b) Week 52 for CMR and functional and other non-invasive variables (safety set)**

a)

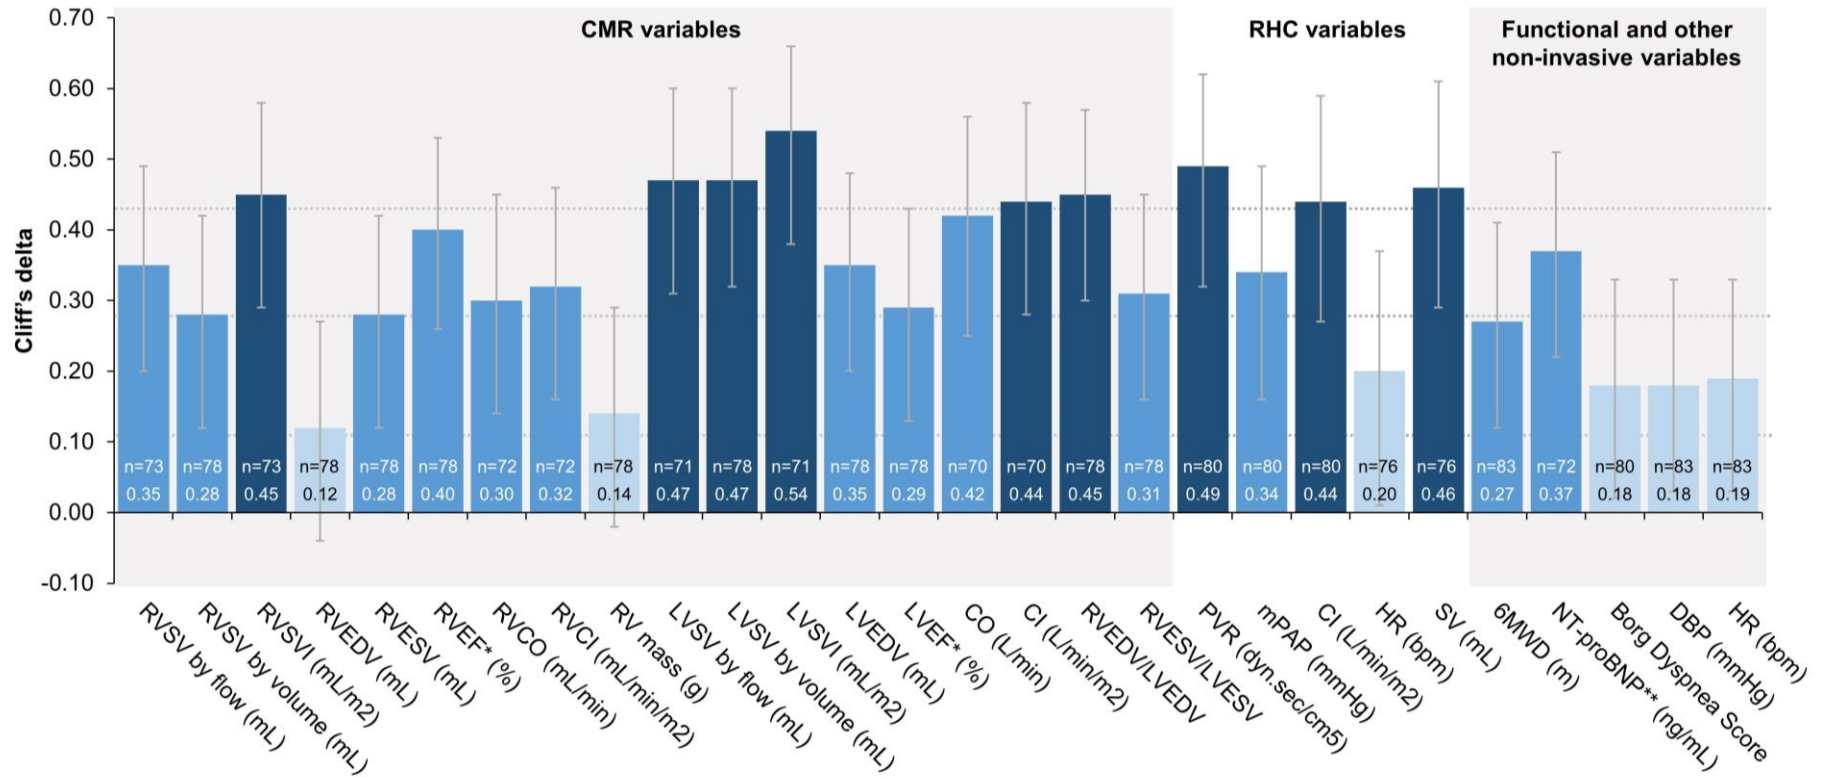

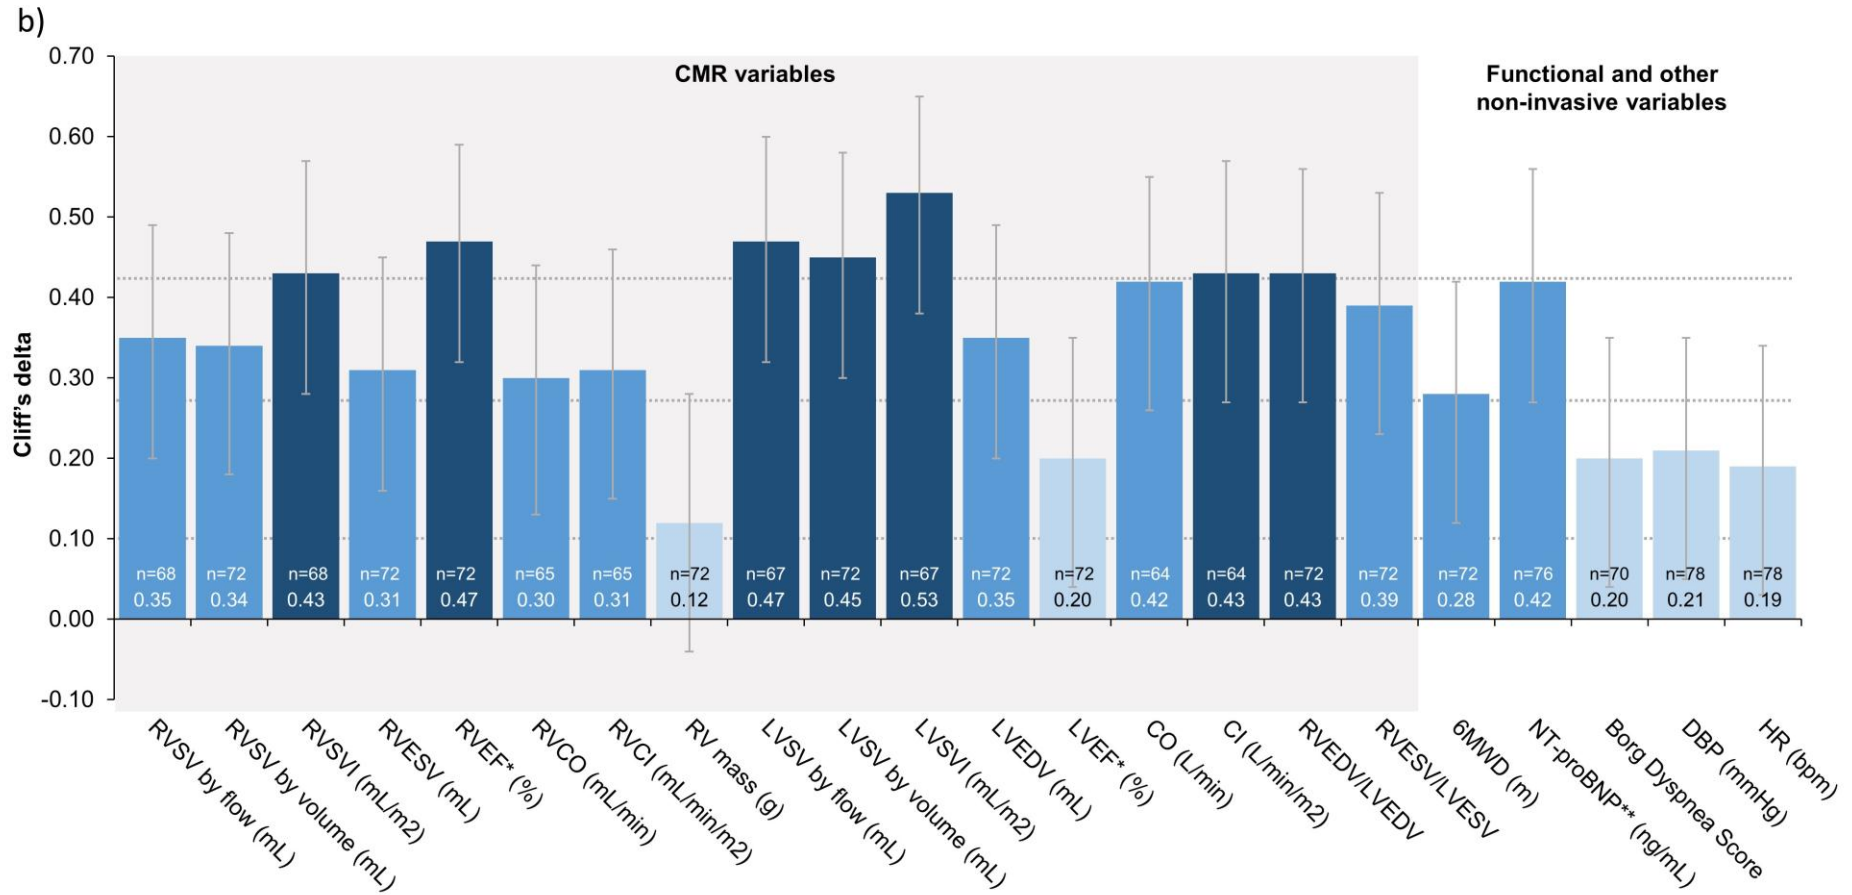

\*Determined from standard volumetric measurements. \*\*Log-transformed. Variables with no treatment effect are not included. n = number of patients with baseline and post-baseline measurements for a specific variable; Cliff's delta statistics are reported below the n values. For the standardised treatment effect sizes, ■ dark blue indicates a large change, ■ mid-blue indicates a medium change, ■ light blue indicates a small/fair change. 6MWD: 6-minute walk distance; CI: cardiac index; CMR: cardiac magnetic resonance imaging; CO: cardiac output; DBP: diastolic blood pressure; HR: heart rate; LV: left ventricular; LVEDV: LV end-diastolic volume; LVEF: LV ejection fraction; LVESV: LV end-systolic volume; LVS: LV stroke volume; LSVI: LVS index; mPAP: mean pulmonary artery pressure; NT-proBNP: N-terminal pro-brain natriuretic peptide; PVR: pulmonary vascular resistance; RHC: right heart catheterisation; RV: right ventricular; RVCI: RV cardiac index; RVCO: RV cardiac output; RVEDV: RV end-diastolic volume; RVEF: RV ejection fraction; RVESV: RV end-systolic volume; RVS: RV stroke volume; RSVI: RVS index; SV: stroke volume

## References

- 1 Fitts DA. Commentary on “A review of effect sizes and their confidence intervals, Part I: The Cohen’s d family”: The degrees of freedom for paired samples designs. *TQMP* 2020; 16: 281–294.
- 2 Macbeth G, Razumiejczyk E, Ledesma RD. Cliff’s Delta Calculator: A non-parametric effect size program for two groups of observations. *Universitas Psychologica* 2011; 10: 545–555.
- 3 Vonk Noordegraaf A, Channick R, Cottreel E, et al. The REPAIR Study: Effects of Macitentan on RV Structure and Function in Pulmonary Arterial Hypertension. *JACC Cardiovasc Imaging* 2022; 15: 240–253.
